# Supplementary material for: Benzoate-based thermally activated delayed fluorescence materials
Source: Royal Society of Chemistry journal article supplement (doi:10.1039/d3ra03289b), 2023-01-01
Supplement: d3ra03289b1.pdf [file d3ra03289b1.pdf]

## Supplementary Information (SI)

### Benzoate-based thermally activated delayed fluorescence materials

Liang Zhang,<sup>\*a</sup> Wenjing Zhu,<sup>a</sup> Kangkang Gao,<sup>a</sup> Yun Wu,<sup>a</sup> Yani Lu,<sup>a</sup> Chao Shuai,<sup>a</sup> Penghui Zhang,<sup>a</sup> Huicheng Li,<sup>a</sup> Chuan-Feng Chen<sup>\*b,c</sup>

<sup>a</sup> College of Petrochemical Engineering, Longdong University, Qingyang 745000, China.

<sup>b</sup> Beijing National Laboratory for Molecular Sciences, CAS Key Laboratory of Molecular Recognition and Function, Institute of Chemistry, Chinese Academy of Sciences, Beijing 100190, China

<sup>c</sup> University of Chinese Academy of Sciences, Beijing 100049, China

E-mail: zhang\_liang1113@126.com; cchen@iccas.ac.cn

|                                                                 |           |
|-----------------------------------------------------------------|-----------|
| <b>1. General information.....</b>                              | <b>S2</b> |
| <b>2. Synthesis and characterization.....</b>                   | <b>S2</b> |
| <b>3. Symbolic Z-matrix.....</b>                                | <b>S4</b> |
| <b>4. <sup>1</sup>H NMR and <sup>13</sup>C NMR spectra.....</b> | <b>S9</b> |

## 1. General information

All reagents were obtained from commercial sources without further purification, and solvents were used as received except specifically mentioned. NMR spectra were recorded on AVIII 300-500 MHz NMR spectrometers. Mass spectra and high resolution mass spectra were recorded with Thermo Fisher® Exactive highresolution LC-MS spectrometer. Ultraviolet spectra were measured on a PerkinElmer® UV/Vis/NIR spectrometer (Lambda 950). The steady fluorescence spectra and lifetimes were recorded on Edinburgh Instruments FLS 980 spectrometer. The values of lifetime were calculated by exponential function fitting with luminescence spectrometer software F900. Theoretical calculations were carried out using the Gaussian 09 program.

## 2. Synthesis and characterization

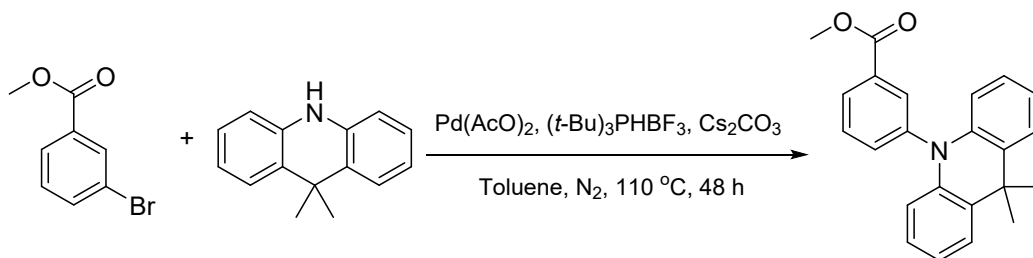

**DMAC-MBZ:** A mixture of Pd(OAc)<sub>2</sub> (44 mg, 0.2 mmol), Cs<sub>2</sub>CO<sub>3</sub> (977 mg, 3.0 mmol), (t-Bu)<sub>3</sub>PHBF<sub>4</sub> (88 mg, 0.3 mmol), methyl 3-bromobenzoate (677 mg, 2.7 mmol) and 9,9-dimethyl-9,10-dihydroacridine (523 mg, 2.5 mmol) in toluene (20 mL) was refluxed under N<sub>2</sub> for 48 h. After cooling to room temperature, the reaction mixture was filtered, and the residue was purified by column chromatography on silica gel to give a white powder (686 mg, yield 80 %). Mp: 78-79 °C. <sup>1</sup>H NMR (400 MHz, CDCl<sub>3</sub>) δ 8.28–8.13 (m, 1H), 8.04 (s, 1H), 7.86–7.65 (m, 1H), 7.56 (d, J = 6.3 Hz, 1H), 7.47 (m, J = 4.7, 2.0 Hz, 2H), 6.95 (d, J = 1.4 Hz, 4H), 6.20 (m, J = 5.2, 1.6 Hz, 2H), 3.92 (d, J = 3.9 Hz, 3H), 1.70 (s, 6H).

<sup>13</sup>C NMR (101 MHz, CDCl<sub>3</sub>) δ 166.29 (s), 141.52 (s), 140.67 (s), 136.41 (s), 133.25 (s), 132.83 (s), 131.02 (s), 130.15 (s), 129.48 (s), 126.43 (s), 125.35 (s), 120.84 (s), 113.95 (s), 77.38 (s), 77.06 (s), 76.74 (s), 52.37 (s), 36.02 (s), 31.25 (s). HRMS (APCI) *m/z*: [M + H]<sup>+</sup> calcd for C<sub>23</sub>H<sub>21</sub>NO<sub>2</sub>, 344.1572; found, 344.1632. Elemental Analysis: calcd. for C<sub>23</sub>H<sub>21</sub>NO<sub>2</sub>: C,80.44; H, 6.16; N, 4.08. Found: C,80.34; H, 6.10; N, 4.12.

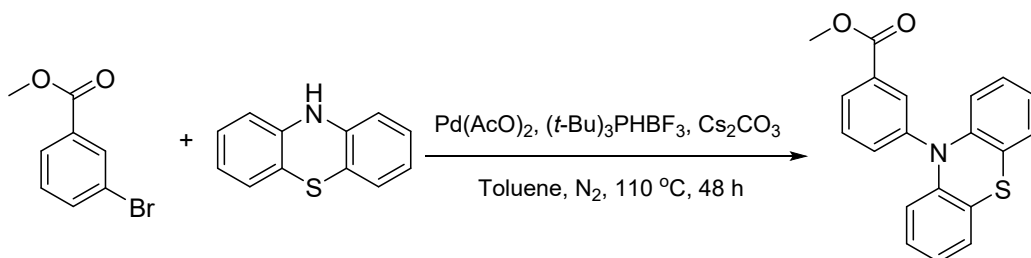

**PTZ-MBZ:** A mixture of Pd(OAc)<sub>2</sub> (44 mg, 0.2 mmol), Cs<sub>2</sub>CO<sub>3</sub> (977 mg, 3.0 mmol), (t-Bu)<sub>3</sub>PHBF<sub>4</sub> (88 mg, 0.3 mmol), methyl 3-bromobenzoate (677 mg, 2.7 mmol) and 10H-phenothiazine (497 mg, 2.5 mmol) in toluene (20 mL) was refluxed under N<sub>2</sub> for 48 h. After cooling to room temperature, the reaction mixture was filtered, and the residue was purified by column chromatography on silica gel to give a yellowish powder (732 mg, yield 83 %). Mp: 99-100 °C. <sup>1</sup>H NMR (400 MHz, CDCl<sub>3</sub>) δ 8.12 (m, J = 11.6, 10.6 Hz, 2H), 7.73 – 7.50 (m, 2H), 7.05 (d, J = 6.9 Hz, 2H), 6.85 (m, J = 10.1, 4.4 Hz, 4H), 6.21 (d, J = 7.4 Hz, 2H), 3.92 (s, 3H). <sup>13</sup>C NMR (101 MHz, CDCl<sub>3</sub>) δ 166.25 (s), 143.85 (s), 141.60 (s), 134.98 (s), 132.97 (s), 131.48 (s), 130.85 (s), 129.03 (s), 126.99 (d, J = 5.7 Hz), 122.96 (s), 121.31 (s), 116.69 (s), 77.43 (s), 77.11 (s), 76.80 (s), 52.42 (s). HRMS (APCI) *m/z*: [M + H]<sup>+</sup> calcd for C<sub>20</sub>H<sub>15</sub>NO<sub>2</sub>S, 334.0823; found, 334.0885. Elemental Analysis: calcd. for C<sub>20</sub>H<sub>15</sub>NO<sub>2</sub>S: C,72.05; H, 4.54; N, 4.20; S, 9.62. Found: C,72.01; H, 4.48; N, 4.24; S, 9.68.

### 3. Symbolic Z-matrix

PTZ-MBZ ( B3LYP-D3BJ/def2-SV(P) optimized geometry):

Charge = 0 Multiplicity = 1

|   |         |         |         |
|---|---------|---------|---------|
| C | 2.08398 | 14.736  | 4.21212 |
| C | 2.65499 | 13.451  | 4.83187 |
| C | 4.16077 | 13.3388 | 5.14082 |
| C | 5.11631 | 14.5075 | 4.81009 |
| C | 4.52157 | 15.8091 | 4.2276  |
| C | 3.01818 | 15.9183 | 3.91639 |
| H | 0.97033 | 14.8143 | 3.98055 |
| H | 1.96073 | 12.5783 | 5.06875 |
| S | 4.77077 | 11.8354 | 5.92118 |
| N | 6.61691 | 14.4481 | 5.0846  |
| H | 5.19515 | 16.7063 | 4.03837 |
| H | 2.59695 | 16.88   | 3.47166 |
| C | 7.3065  | 13.2591 | 5.74676 |
| C | 6.5378  | 12.0035 | 6.21528 |
| C | 8.84062 | 13.2958 | 5.91861 |

|   |         |         |         |
|---|---------|---------|---------|
| C | 9.58072 | 12.1449 | 6.62295 |
| C | 8.79834 | 10.9271 | 7.1364  |
| C | 7.27914 | 10.8529 | 6.922   |
| H | 9.43671 | 14.1765 | 5.51414 |
| H | 10.7113 | 12.1946 | 6.76008 |
| H | 9.34408 | 10.0769 | 7.66487 |
| H | 6.69898 | 9.93941 | 7.28087 |
| C | 7.465   | 15.6452 | 4.69483 |
| C | 7.03911 | 16.5487 | 3.52116 |
| C | 7.88473 | 17.7778 | 3.13916 |
| C | 9.15587 | 18.1157 | 3.93805 |
| C | 9.58442 | 17.2165 | 5.11112 |
| C | 8.74754 | 15.9787 | 5.48097 |
| C | 10.8409 | 17.5636 | 5.92899 |
| O | 11.6504 | 18.7889 | 5.58206 |
| C | 11.1202 | 19.9647 | 6.36655 |
| O | 11.2744 | 16.6671 | 7.06433 |
| H | 6.09571 | 16.3046 | 2.93001 |
| H | 7.56629 | 18.44   | 2.26771 |
| H | 9.77605 | 19.0324 | 3.66481 |

|   |         |         |         |
|---|---------|---------|---------|
| H | 11.7283 | 20.8948 | 6.11258 |
| H | 11.2071 | 19.7465 | 7.4821  |
| H | 10.0264 | 20.1392 | 6.09706 |
| H | 9.06603 | 15.3209 | 6.35534 |
| H | 15.1803 | 17.2574 | 5.0669  |

**DMAC-MBZ ( B3LYP-D3BJ/def2-SV(P) optimized geometry):**

Charge = 0 Multiplicity = 1

|   |         |         |         |
|---|---------|---------|---------|
| C | 2.51422 | 15.4361 | 5.7566  |
| C | 2.93202 | 13.957  | 5.69124 |
| C | 4.42256 | 13.5723 | 5.62752 |
| C | 5.5029  | 14.6736 | 5.60962 |
| C | 5.07972 | 16.1523 | 5.74059 |
| C | 3.58953 | 16.5339 | 5.79516 |
| H | 1.40978 | 15.7169 | 5.78932 |
| H | 2.13549 | 13.1414 | 5.69129 |
| C | 4.80023 | 12.0791 | 5.60829 |
| N | 6.96884 | 14.3068 | 5.50392 |
| H | 5.87054 | 16.9678 | 5.8116  |
| H | 3.28365 | 17.6296 | 5.86929 |
| C | 7.37439 | 12.8482 | 5.5721  |

|   |         |         |         |
|---|---------|---------|---------|
| C | 6.29984 | 11.7535 | 5.73226 |
| C | 4.05624 | 11.3836 | 6.76193 |
| C | 8.85668 | 12.4356 | 5.461   |
| C | 9.27432 | 10.9751 | 5.71177 |
| C | 8.20676 | 9.9121  | 6.02055 |
| C | 6.71868 | 10.2985 | 6.00918 |
| H | 9.64655 | 13.2061 | 5.18435 |
| H | 10.3749 | 10.6814 | 5.66777 |
| C | 4.30023 | 11.4838 | 4.2801  |
| H | 4.26787 | 10.2635 | 6.73714 |
| H | 2.93612 | 11.5649 | 6.65054 |
| H | 4.41626 | 11.8184 | 7.75208 |
| H | 8.51612 | 8.83601 | 6.23478 |
| H | 5.92249 | 9.50321 | 6.19145 |
| H | 3.17855 | 11.6644 | 4.18564 |
| H | 4.51146 | 10.3636 | 4.25598 |
| H | 4.8432  | 11.9937 | 3.41714 |
| C | 8.01282 | 15.4008 | 5.34954 |
| C | 7.58955 | 16.8015 | 4.86372 |
| C | 8.63078 | 17.9268 | 4.72645 |

|   |         |         |         |
|---|---------|---------|---------|
| C | 10.1135 | 17.6418 | 5.0155  |
| C | 10.5499 | 16.2348 | 5.4573  |
| C | 9.49729 | 15.131  | 5.67268 |
| C | 12.0436 | 15.9325 | 5.67496 |
| O | 13.0664 | 17.0295 | 5.50254 |
| C | 14.4126 | 16.4237 | 5.18971 |
| O | 12.4917 | 14.5317 | 6.01303 |
| H | 6.50234 | 17.0045 | 4.59191 |
| H | 8.30472 | 18.9673 | 4.39393 |
| H | 10.8895 | 18.4676 | 4.89003 |
| H | 9.81763 | 14.1223 | 6.09171 |
| H | 14.3455 | 15.8234 | 4.22302 |
| H | 14.7308 | 15.7365 | 6.04181 |
| H | 15.1803 | 17.2574 | 5.0669  |



## 4. $^1\text{H}$ NMR and $^{13}\text{C}$ NMR spectra

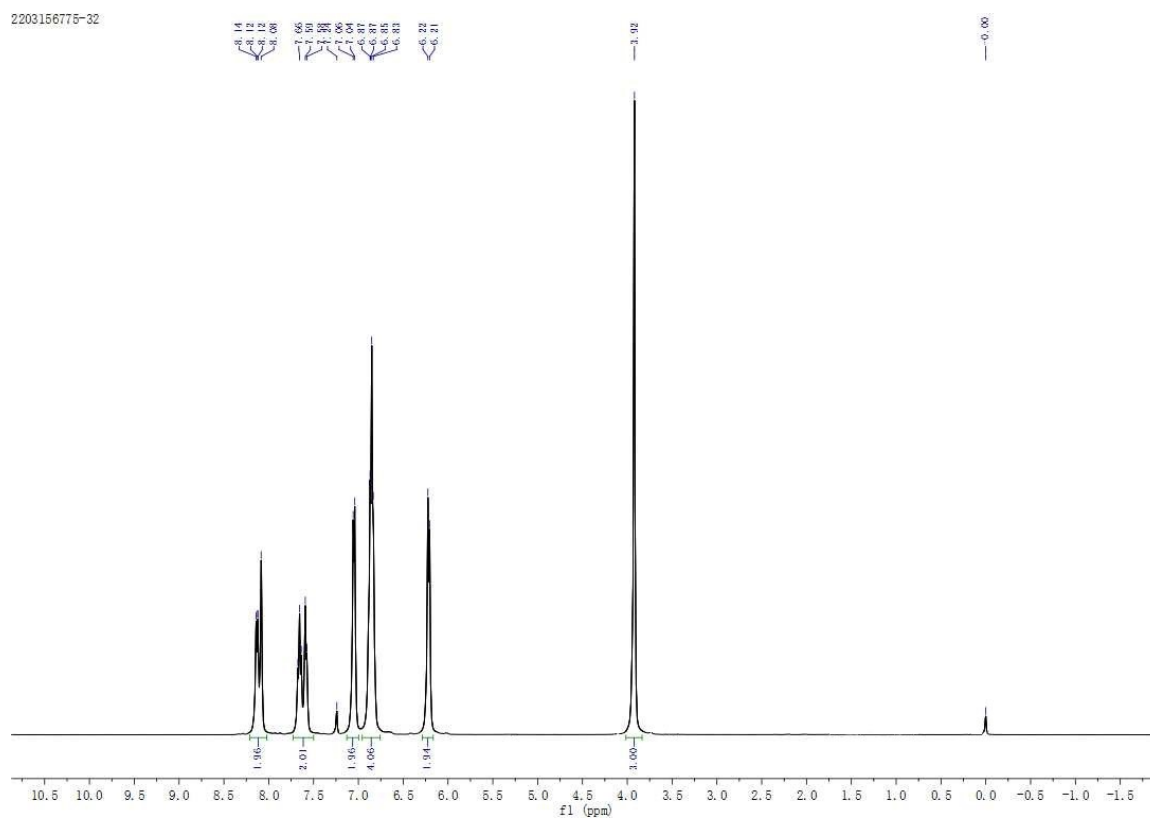

**Fig. S1**  $^1\text{H}$  NMR spectrum (300 MHz,  $\text{CDCl}_3$ ) of PTZ-MBZ.

2203224245-32

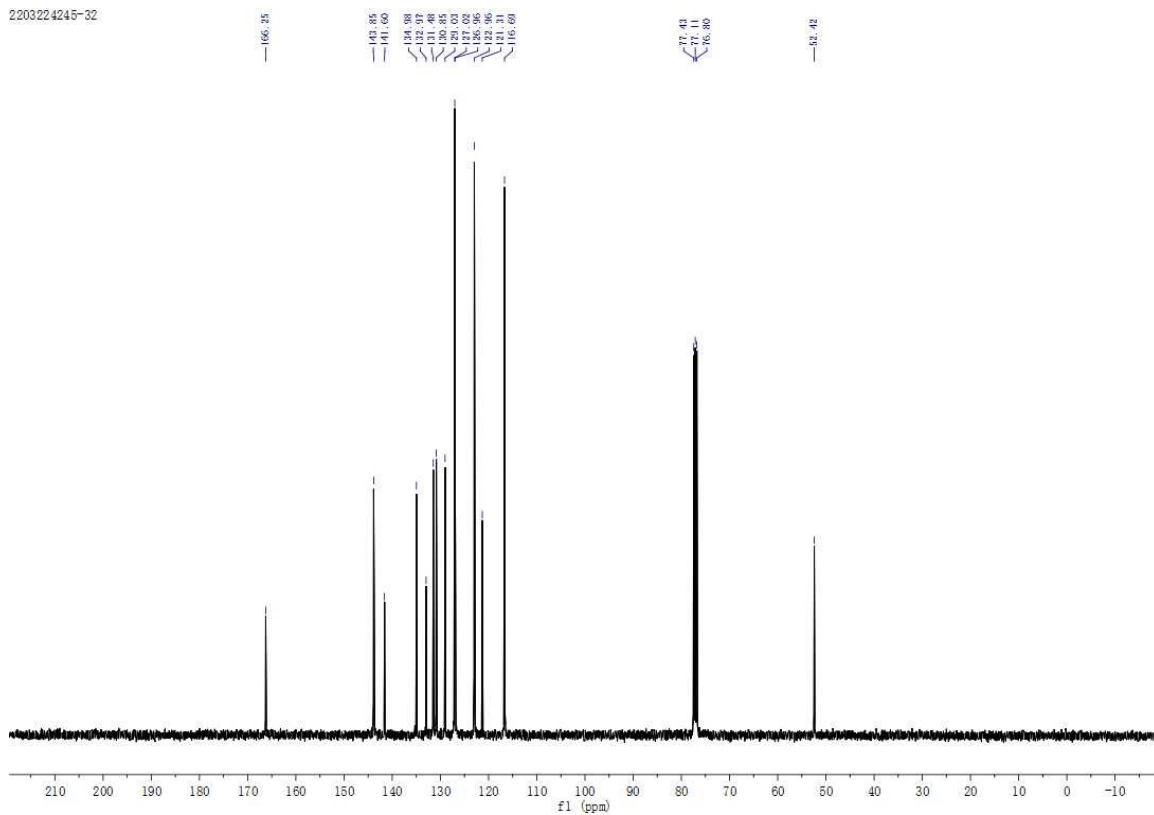

**Fig. S2**  $^{13}\text{C}$  NMR spectrum (126 MHz,  $\text{CDCl}_3$ ) of PTZ-MBZ.

2203156775-26

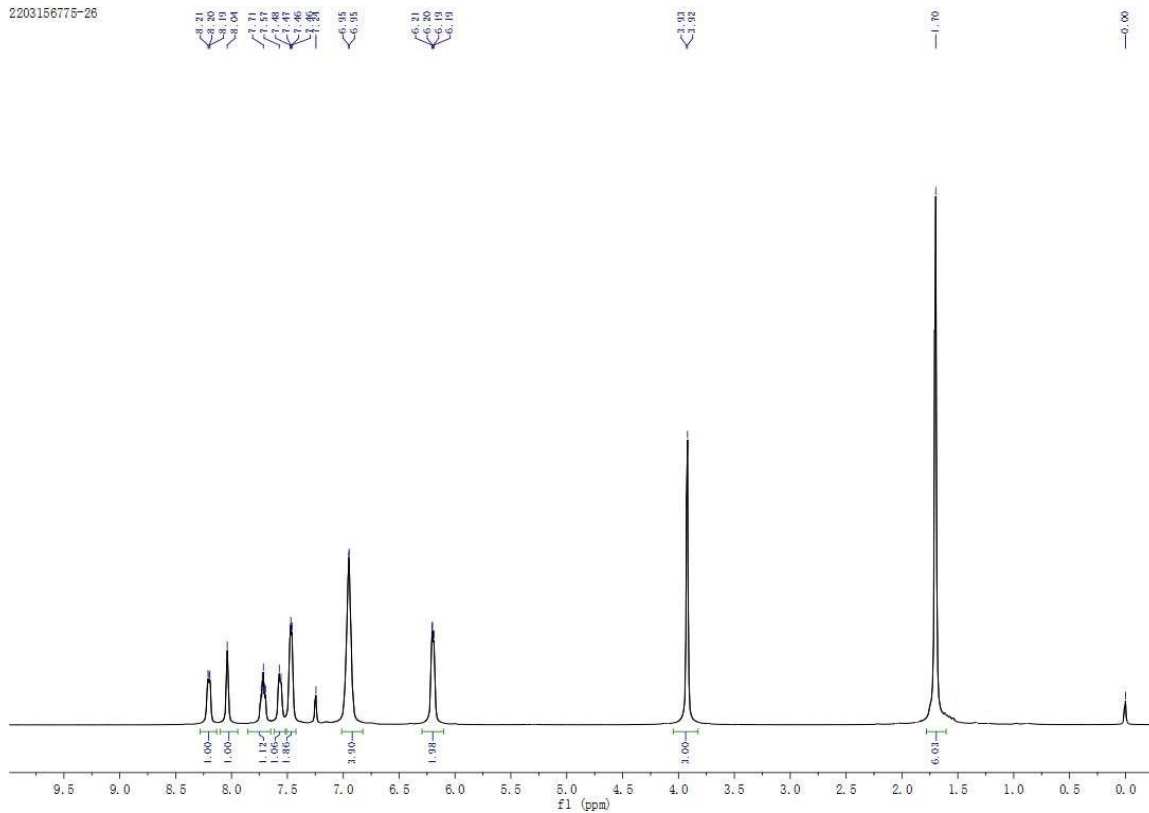

**Fig. S3**  $^1\text{H}$  NMR spectrum (300 MHz,  $\text{CDCl}_3$ ) of **DMAC-MBZ**.

2203224245-26

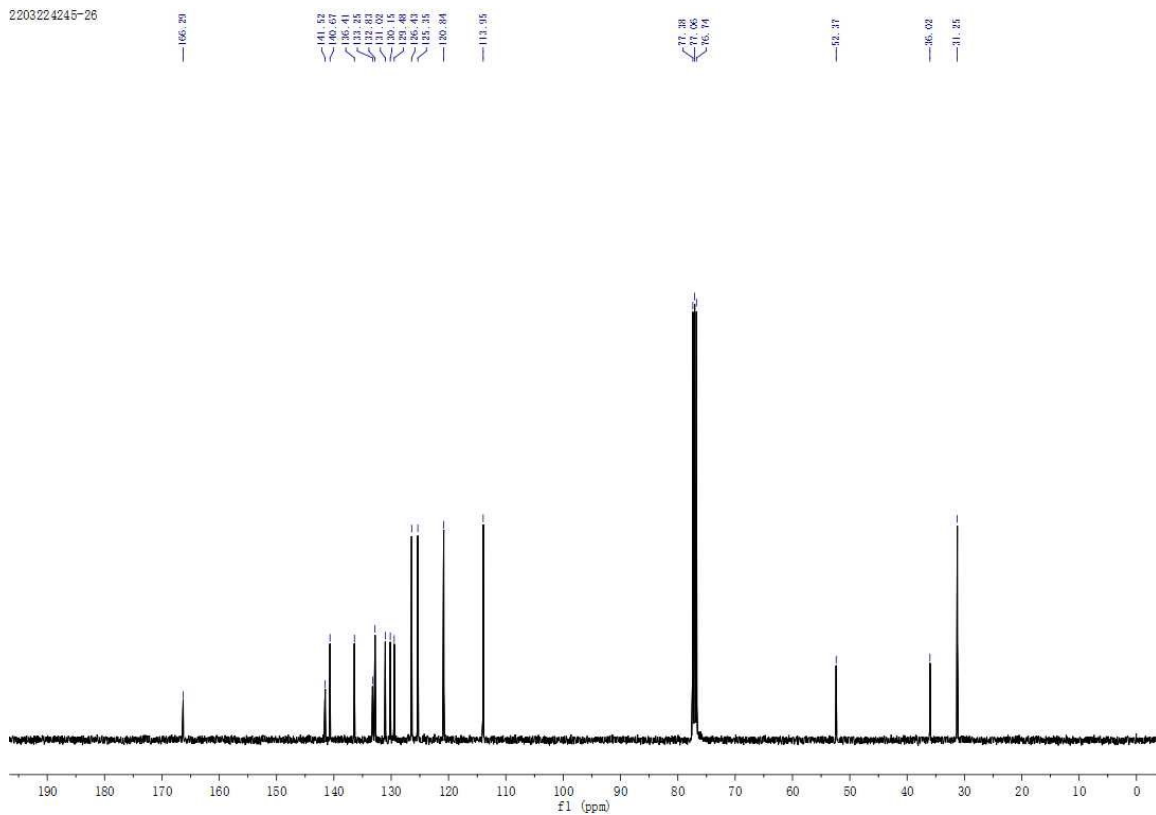

**Fig. S4**  $^{13}\text{C}$  NMR spectrum (126 MHz,  $\text{CDCl}_3$ ) of **DMAC-MBZ**.

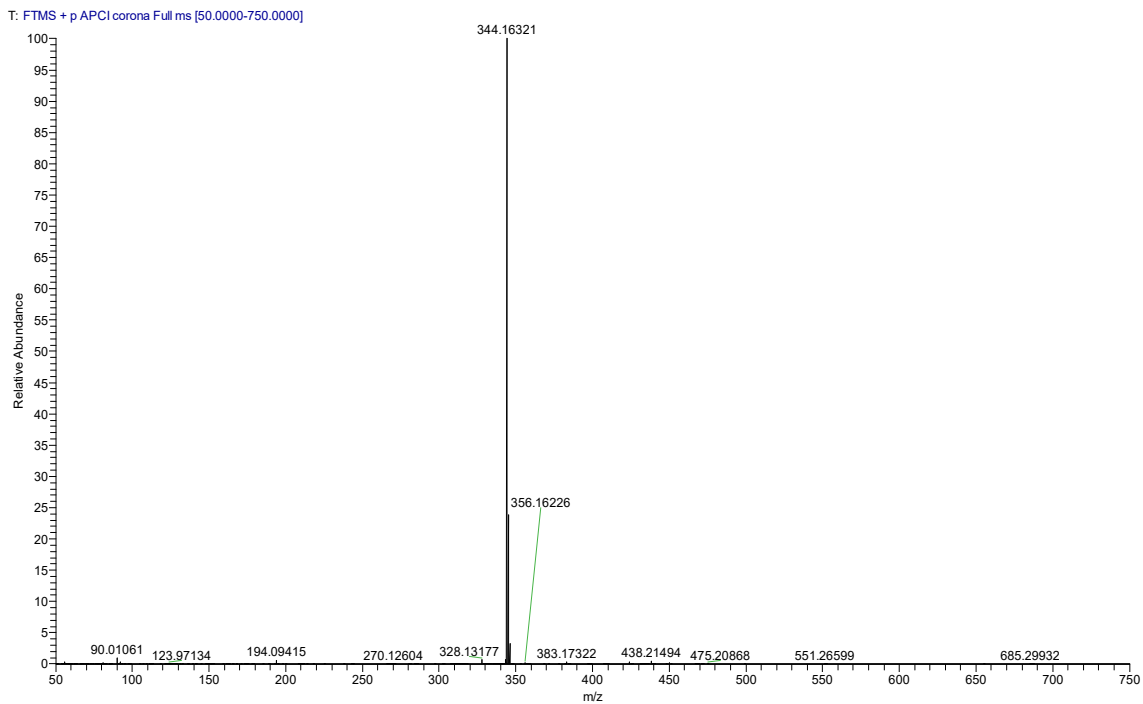

**Fig. S5** HRMS spectra of **DMAC-MBZ**.

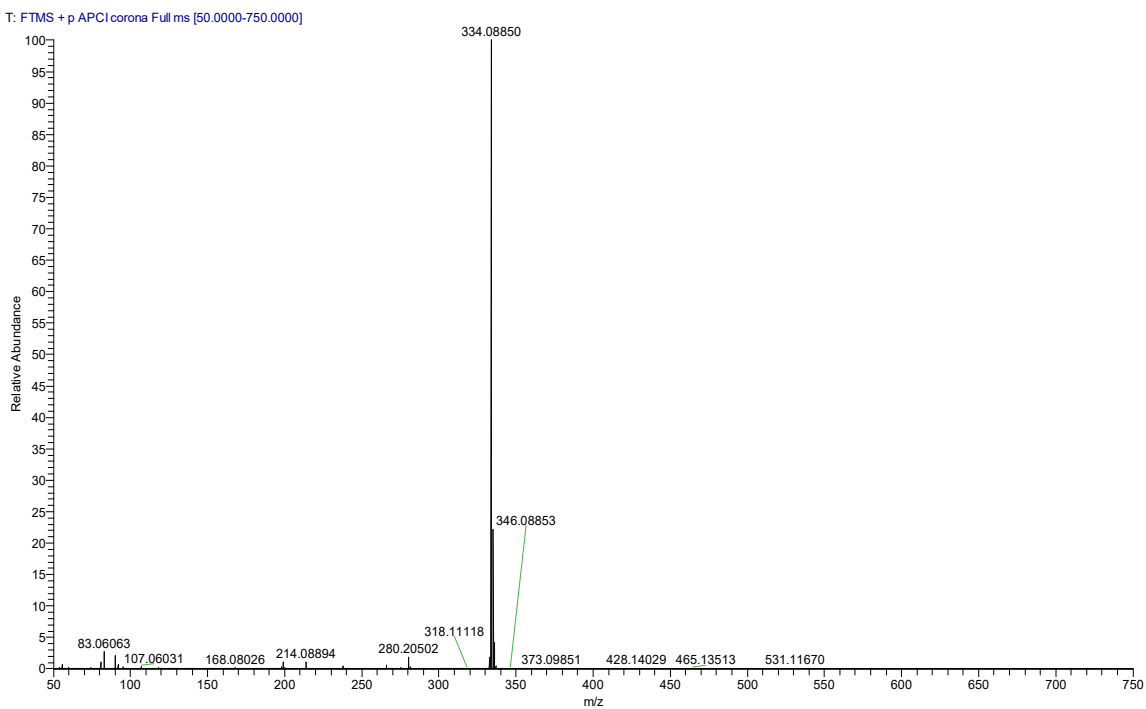

**Fig. S6** HRMS spectra of **PTZ-MBZ**.
